# Implicit temporal predictability biases slow oscillatory phase in auditory cortex and enhances pitch discrimination sensitivity

Sophie K. Herbst<sup>1,2</sup> and Jonas Obleser<sup>1</sup>

<sup>1</sup>Department of Psychology, University of Lübeck Ratzeburger Allee 160, 23552 Lübeck, Germany

<sup>2</sup>NeuroSpin, CEA, DRF/Joliot, INSERM Cognitive Neuroimaging Unit, Bât 145, Gif s/ Yvette 91190, France

---

## Abstract

Can human listeners use strictly implicit temporal contingencies in auditory input to form temporal predictions, and if so, how are these predictions represented endogenously? To assess this question, we implicitly manipulated foreperiods in an auditory pitch discrimination task. Unbeknownst to participants, the pitch of the standard tone could either be deterministically predictive of the onset of the target tone, or convey no predictive information. Both conditions were presented interleaved in one stream, and separated by variable inter-stimulus intervals such that there was no dominant stimulus rhythm throughout. Even though participants were unaware of the implicit temporal contingencies, pitch discrimination sensitivity (i.e. the slope of the psychometric function) increased when the onset of the target tone was predictable in time ( $N = 49$ ). Concurrently recorded EEG data ( $N = 24$ ) revealed that standard tones which initiated temporal predictions evoked a more negative N1 component than non-predictive standards, and were followed by an increase in delta power during the foreperiod. Furthermore, the phase angle of delta oscillations (1–3Hz) evoked by the standard tone predicted pitch discrimination sensitivity at the target tone (1.75 s later on average), which suggests that temporal predictions can be initiated by an optimized delta phase reset. In sum, we show that auditory perception benefits from implicit temporal contingencies, and provide evidence for a role of slow neural oscillations in the endogenous representation of temporal predictions, in absence of exogenously driven entrainment to rhythmic input.

---

**Significance Statement:** Temporal contingencies are ubiquitous in sensory environments, especially in the auditory domain, and have been shown to facilitate perception and action. Yet, how these contingencies in exogenous inputs are transformed into an endogenous representation of temporal predictions is not known. Here, we implicitly induced temporal predictability in the absence of a rhythmic input structure, that is without exogenously driven entrainment of neural oscillations. Our results show that even implicit and non-rhythmic temporal predictions are extracted and used by human observers, underlining the role of timing in sensory processing. Furthermore, our EEG results point towards an instrumental role of delta oscillations in initiating temporal predictions by an optimized phase reset in response to a temporally predictive cue.

**Acknowledgments:** This research was supported by a DFG grant (HE 7520/1-1) to SKH. The authors would like to thank Anne Herrmann for overseeing the data acquisition, Michael Ploechl for technical support, and Virginie van Wassenhove and the Cognition & Brain Dynamics Group at NeuroSpin for helpful discussions.

Conflict of interest: None.

Number of Pages: 29

Number of Figures: 5

Number of Tables: 0

Number of Words: Abstract: 263, Significance Statement: 116, Introduction: 750, Discussion: 1790

## 1 Introduction

2 The human brain is constantly engaged in forming predictions about its environment, concerning the  
3 *where*, the *what*, and crucially also the *when* of future events. These temporal aspects of predictions  
4 have only recently become the focus of dedicated investigation (Coull and Nobre, 1998; Nobre et al.,  
5 2007; Nobre and van Ede, 2018; Rimmele et al., 2018), contrary to spatial or content-based ones.  
6 That discrepancy could be explained by the fact that temporal aspects are inherent to any kind of  
7 input and are thus difficult to isolate experimentally.

8 Implicit temporal statistics of visual and auditory input are extracted by the human cognitive  
9 system, and benefit perception and action (Cravo et al., 2011; Herbst and Obleser, 2017). In the  
10 auditory domain, rhythmic input structure has been shown to improve detection performance and  
11 speed (Henry and Obleser, 2012; Lawrance et al., 2014; Rimmele et al., 2011; Stefanics et al., 2010;  
12 Wright and Fitzgerald, 2004). Fewer studies have shown that rhythmic temporal regularities can also  
13 improve perceptual sensitivity (i.e. discrimination performance) in the auditory (Jones et al., 2002;  
14 Morillon et al., 2016; Schmidt-Kassow et al., 2009; but see Bauer et al., 2015), as well as the visual  
15 domain (Cravo et al., 2013; Rohenkohl et al., 2012).

16 In order to study implicit timing in the absence of a direct rhythmic input structure, we here  
17 induced temporal predictability by repeating single predictive intervals in a so-called foreperiod  
18 paradigm (Niemi and Näätänen, 1981; Woodrow, 1914). This type of manipulation has been shown  
19 to increase visual perceptual sensitivity (Correa et al., 2004, 2005; Cravo et al., 2011; Rolke and Hof-  
20 mann, 2007). In addition, predictable foreperiods have been found to speed up stimulus processing  
21 (Bausenhardt et al., 2007) and improve short-term memory performance (Wilsch et al., 2018, 2014).  
22 To our knowledge, no study has shown an effect of implicit non-rhythmic temporal predictability on  
23 perceptual sensitivity in the auditory domain.

24 An important question is how temporal contingencies in exogenous inputs are transformed  
25 into an endogenous representation of temporal predictability (van Wassenhove, 2016). Here, we  
26 investigate the hypothesis that slow neural oscillations (in the delta/1–3 Hz and theta/4–7 Hz fre-  
27 quency bands) implement temporal predictions via endogenous phase-resetting and -shifting mech-  
28 anisms. This hypothesis can be drawn back to the influential proposal of *Dynamic Attending in Time*  
29 (DAT; Jones, 1976; Large and Jones, 1999), suggesting that (auditory) attention fluctuates in phase  
30 with rhythmic input.

31 A neural implementation of dynamic attending has been shown through phase-locking of  
32 neural delta oscillations to rhythmic inputs, resulting in fluctuations of performance in phase with  
33 the oscillation (Arnal et al., 2014; Barczak et al., 2018; Besle et al., 2011; Henry and Obleser, 2012;  
34 Herrmann et al., 2016; Lakatos et al., 2008; Schroeder and Lakatos, 2009; Stefanics et al., 2010). En-  
35 trainment reflects an internalization of the exogenous temporal structure, aligning the most efficient  
36 brain states for sensory processing to the most likely time points for stimulus occurrence, shown  
37 to surface as enhanced phase coherence of slow oscillations in anticipation of temporally predictive  
38 input (Breska and Deouell, 2017; Cravo et al., 2013; Wilsch et al., 2015).

39 It is, however, not trivial to disentangle mechanistic input-driven alignment of neural activity  
40 to rhythmic input from an internalized and endogenously activated representation of temporal pre-  
41 dictions. Important evidence for an endogenous role of delta oscillations in explaining fluctuations  
42 of auditory attention over time comes from two studies showing that auditory processing fluctuates  
43 with the phase of spontaneously present delta activity in auditory cortex, in absence of rhythmic  
44 stimulation (Henry et al., 2016; Kayser et al., 2015).

45 Building on these results, we here asked whether endogenous delta oscillations can implement  
46 temporal predictions that need to be instantiated on a single trial basis (Haegens and Golumbic,  
47 2017; Rimmele et al., 2018). Few studies have reported a role of slow oscillations in single trial  
48 temporal predictions, but used either visual stimulation (Cravo et al., 2011, theta band), or explicit  
49 temporal predictions in audition (Stefanics et al., 2010, Exp.II, delta band). Furthermore, a recent  
50 study by Barne et al. (2017) showed that delta phase in the target-onset time window reflects ad-  
51 justments to previously encountered violations of temporal predictions in an explicit timing task.  
52 To date, to the best of our knowledge, no study has shown that slow oscillations implement implicit  
53 temporal predictions for audition.

54 Here, we investigate the role of neural oscillatory dynamics for an endogenous representation  
55 of temporal predictions in auditory inputs, in absence of direct local temporal structures, using a de-  
56 liberately non-rhythmic foreperiod paradigm in which the relevant intervals have to be internalized  
57 by the auditory system (i.e., extracted, stored, and activated) to actively generate a prediction when  
58 a new trial is presented (Haegens and Golumbic, 2017).

59 We implicitly associated temporal predictability to a sensory feature of the standard tone in an  
60 auditory pitch discrimination task: the standard's pitch could be deterministically predictive of the  
61 onset time (but not the pitch) of the target tone, or convey no predictive information. Both conditions  
62 were presented interleaved in one stream, and separated by variable inter-stimulus intervals such  
63 that there was no dominant stimulus rhythm throughout.

64 We show that, behaviourally, temporal predictability increases pitch discrimination sensitiv-  
65 ity, assessed via the slope of the psychometric function. Concurrently recorded EEG data provide  
66 indices of temporally predictive processing in auditory cortex evoked by both the standard and target  
67 tone. Furthermore, we show enhanced delta power in the predictive compared to the non-predictive  
68 condition, and (by applying an auditory spatial filter) a predictive relationship between delta phase  
69 angle in auditory areas evoked by the temporal cue and pitch discrimination performance. Together,  
70 these results suggest an instrumental role of delta oscillations in forming temporal predictions.

## 71 **Methods**

### 72 **Participants**

73 In total, 51 participants were tested (23.6 years on average (SD = 3.5), 28 female, 6 left handed),  
74 26 of which also underwent electroencephalography (EEG). All participants signed informed con-  
75 sent and received either course credit or payment for their participation (8 € per hour). The study

76 was approved by the local ethics committee at the University of Lübeck. We excluded two of the  
77 participants who only underwent the behavioral testing, because of ceiling effects (their slopes for  
78 the psychometric function in one of the two conditions exceeded the mean of the slope distributions  
79 of all participants by more than 2.5 standard deviations). Furthermore, we excluded the EEG data  
80 from two participants who had blinked in synchrony with the auditory stimulation and for whom  
81 we were not able to separate blinks from the auditory evoked potentials during EEG preprocessing.  
82 The behavioural data of these two participants were kept in the analyses.

## 83 **Stimuli and Procedure**

84 The experiment was conducted in an electrically shielded sound-attenuated EEG booth. Stimulus  
85 presentation and collection of behavioural responses was achieved using the Psychophysics Toolbox  
86 (Brainard, 1997; Pelli, 1997) under Windows 7. Responses were collected on a standard keyboard.  
87 All participants were instructed to use the index and middle fingers of the right hand.

88 Participants performed a pitch discrimination task, comparing tone pairs embedded in noise,  
89 as illustrated in Figure 1A. They were instructed to indicate after each tone pair whether the second  
90 tone was lower or higher than the first. After the target tone, participants had 2 s to respond. The  
91 stimulation continued automatically, even if no response was given.

92 A black fixation cross was displayed on gray background throughout the whole block. Audi-  
93 tory stimuli were delivered via headphones (Sennheiser HD 25-SP II). Lowpass (5kHz) filtered white  
94 noise was presented constantly throughout each block, at 50 dB above the individual sensation level,  
95 which was determined for the noise alone at the beginning of the experiment using the method of  
96 limits. Pure tones of varying frequencies (duration 50 ms with a 10 ms on- and offset ramp), were  
97 presented with a tone-to-noise ratio fixed at -18 dB relative to the noise level.

98 The first tone, to which we will refer as the *standard* in the following was always at one of two  
99 frequencies: 550 or 950 Hz. The second tone, the *target*, was varied in individually predetermined  
100 steps around its respective standard. The same step size was used for both standards, but logarith-  
101 mically transformed and multiplied with the standard frequency, to obtain a log-spaced frequency  
102 scale around each standard. To predetermine the step size, each participant was first presented with  
103 one experimental block to familiarize themselves with the task. Then, a second block was performed,  
104 and if pitch discrimination performance was below 65%, the tone-steps were increased, which was  
105 repeated up to three times. All participants reached the minimum performance level after mini-  
106 mally two and maximally four rounds of training. As a result of this procedure, the average lowest  
107 target tone presented with the 550 Hz standard was 508.3 Hz (range 490.0–519.1 Hz), and the high-  
108 est target tone 595.3 Hz (range 582.7–617.4 Hz); the lowest target tone presented with the 950 Hz  
109 standard was 878.0 Hz (range 846.4–896.7 Hz), and the highest target tone 1028.3 Hz (range 1006.5–  
110 1066.3 Hz). The high and low tones never overlapped. In the behavioural experiment, eleven tone  
111 frequencies were used from the lowest to highest tone, including the standard; in the EEG experi-  
112 ment we used 7 discrete frequencies.

113 Critically, and unbeknownst to participants, we manipulated the interval between standard  
114 and target tones, the *foreperiod*, by either pseudo-randomly drawing foreperiods from a discretized

115 uniform foreperiod duration (11 foreperiods in the behavioral experiment and 7 in the EEG experi-  
116 ment, all ranging from 0.5–3 s, blue distribution in Figure 1 A), or used the same foreperiod duration  
117 (1.75 s, green distribution in Figure 1 A). This resulted in one condition in which the target onset  
118 was perfectly predictable in time, the *predictive condition*, and one condition in which the target onset  
119 was maximally jittered, the *non-predictive condition*. To allow participants to implicitly dissociate the  
120 conditions, the foreperiod distributions were associated with one of the standard pitches, for exam-  
121 ple for one participant the 550 Hz standard was always followed by a predictive foreperiod and the  
122 950 Hz standard was always followed by a non-predictive foreperiod. The assignment was counter-  
123 balanced over participants. The two conditions were presented interleaved, such that participants  
124 had to encode the standard pitch on each trial. Importantly, the manipulation of foreperiod intervals  
125 was strictly implicit, and participants were not informed about it.

126 To avoid build-up of a rhythm over trials, the inter-stimulus interval between a target tone  
127 and the standard tone of the next trial was drawn from a truncated exponential distribution (mean  
128 1.5 s, truncated at 3 s) added to a minimum interval of 3 s (resulting in values between 3–6 s).  
129 One block consisted of 22 trials in the behavioural (one repetition per tone step and condition),  
130 and 56 trials in the EEG experiment (4 repetitions per tone step and condition). In the behavioural  
131 experiment participants performed 20 blocks (440 trials), and in the EEG experiment minimally 12  
132 and maximally 15 blocks (672–840 trials). Between blocks, participants could take breaks of self-  
133 determined length. Feedback was given per trial during the training, and at the end of each block  
134 (as proportion of correctly answered trials) during the main experiment.

135 After the experiment, all participants were asked the same four questions by the experimenter.  
136 First, the experimenter asked whether participants had noticed that the interval between the first and  
137 second tone of a pair was variable. Second, they were asked to describe whether they noticed any  
138 systematic variation therein. Third, they were told that either the low or high tones were always  
139 presented with the same separating interval and asked whether they noticed this. Fourth, they were  
140 asked to guess whether in their case the low or high pitch tones were the ones presented with the con-  
141 stant interval. Finally, they filled in a musicality survey (Schaal et al., 2014). The full experimental  
142 session lasted about 2.5 h.

## 143 EEG recording and preprocessing

144 EEG was recorded with 64 electrodes Acticap (Easy Cap) connected to an ActiChamp (Brain Prod-  
145 ucts) amplifier. EEG signals were recorded with the software Brain Recorder (Brain Products) at a  
146 sampling rate of 1 kHz, using no online high-pass filter and a 200 Hz low-pass filter. Impedances  
147 were kept below 10 k $\Omega$ . Electrode TP9 (left mastoid) served as reference during recording. Electrode  
148 positions were digitized.

149 EEG data were analysed using the Fieldtrip software package for Matlab (MATLAB 2016a,  
150 MATLAB 2017a), and the lme4 package in R (Bates et al., 2015; R Core Team, 2016). First, we re-  
151 referenced the data to linked mastoids. Then we applied a low-pass filter to the continuous data  
152 (firws filter from the firfilt plugin, Widmann et al., 2015, cut-off 45 Hz, two-pass, transition band-

153 width 3 Hz). No high-pass filter was applied. For the time-frequency analysis, we produced a par-  
 154 allel version of the data, that was not filtered during pre-processing. Filtering two-pass as done for  
 155 the analyses of event related potentials might smear data back in time, which would be problematic  
 156 for analyses in the pre-target time window (Rousselet, 2012; Zoefel and Heil, 2013). Filtering the  
 157 data only in the forward direction, however, leads to phase shifts (Widmann et al., 2015) which we  
 158 wanted to avoid for the phase angle analyses.

159 Next, we epoched the data around the standard tone onset (-3-6 s), and down-sampled to  
 160 100 Hz. All data were visually inspected to mark bad channels that were interpolated (1.2 channels  
 161 on average). Then ICA were computed using the 'runica' algorithm, with the number of output  
 162 components adjusted by subtracting the number of bad channels. Blinks, muscular artefacts, and

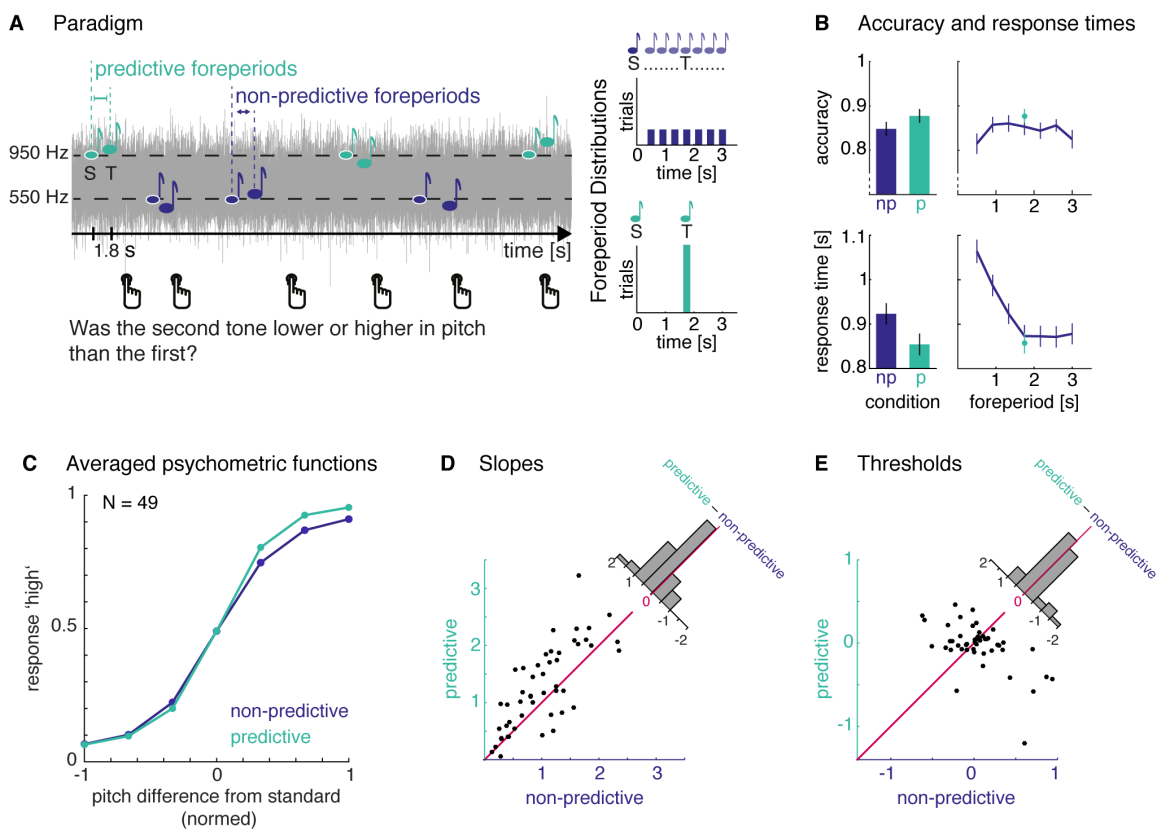

**Figure 1: Paradigm and Behavioural Results. A. Paradigm:** Tone-pairs were presented embedded in low-pass filtered white noise. Participants' task was to judge whether the target tone (T) was lower or higher in pitch than the preceding standard (S). Unbeknownst to participants, the pitch of the standard tone was associated with predictive (green) or non-predictive foreperiod intervals (blue). For the non-predictive condition, foreperiods were drawn from a uniform distribution (upper right panel), while for the predictive condition, foreperiods were fixed at 1.75 s (lower right panel). **B. Accuracy and response times:** Top: Accuracy improved significantly in the predictive condition (left panel), which was nominally also true at the intermediate foreperiod only. Bottom: Response times were faster in the predictive condition (left panel). The difference was driven by slower response times at short foreperiods on the non-predictive condition (right panel) **C. Averaged psychometric functions:** The slope of the psychometric function was steeper in the predictive compared to the non-predictive condition. There were no differences in threshold, guess rate or lapse rate. **D. Slopes for single participants:** for the non-predictive (x-axis) versus predictive (y-axis) conditions. **E. Thresholds for single participants:** for the non-predictive (x-axis) versus predictive (y-axis) conditions.

163 unspecific noise occurring temporarily in a channel or trial were excluded, using the semi-automatic  
164 inspection of ICA components provided by the SASICA toolbox for fieldtrip (Chaumon et al., 2015)  
165 and removal of these (on average 33.7 components per participant).

## 166 **Analyses**

### 167 **Analyses of the behavioural data**

168 We analysed accuracy as proportion correct (after removing trials in which the standard and target  
169 were equal in pitch) and response times, defined as the interval between the onset of the target tone  
170 and the registered button press. Response times shorter than 0.2 s were considered outliers and  
171 removed. We compared accuracy and response times between conditions and over foreperiods for  
172 the non-predictive condition. Tone-steps and foreperiods used in the behavioral experiment were  
173 binned to reduce the 11 steps used to 7 as in the EEG-experiment.

174 To obtain a measure of pitch discrimination sensitivity, we fitted psychometric functions to  
175 model participants' responses in the pitch discrimination task, using bayesian inference, imple-  
176 mented in the *Psignifit toolbox* for Matlab (Version 4, Schütt et al., 2016). The psychometric function  
177 describes the relationship between the stimulus level (on the abscissa, here: the difference in pitch  
178 between the target and the respective standard tone) and the participant's answer (on the ordinate,  
179 here: proportion of trials on which the target pitch was judged as higher). To accommodate the dif-  
180 ferent standard tones per condition, and the individual pitch steps obtained during the training, we  
181 normed the discrete pitch differences per participant and condition to range between -1 and 1, with  
182 0 being the pitch of the standard tone.

183 To select the options for the psychometric function (logistic versus cumulative normal func-  
184 tion, number of free parameters), we assessed deviance pooled for both conditions. Deviance reflects  
185 a monotonic transformation of the log-likelihood-ratio between the fitted model and the saturated  
186 model (a model with no residual error), allowing for an absolute interpretation, or a comparison  
187 between different models (Wichmann and Hill, 2001). The best fits (i.e. lowest deviance, 3.80 for  
188 the best model) were obtained by fitting a cumulative normal function with four free parameters:  
189 threshold, slope, guess rate, lapse rate.

190 For a yes-no-task as the one used here, threshold indicates the stimulus level at which a par-  
191 ticipant is as likely to judge the stimulus as 'low' or 'high'. Divergence from the actual midpoint  
192 of all stimulus levels (here: 0) can be interpreted as a response bias. Slope reflects the amount of  
193 stimulus change needed to increase the proportion of responding 'high', and can be interpreted as  
194 the sensitivity of the listener. The guess rate indicates the proportion of answering 'high' for the low-  
195 est pitches in the tested range, and the lapse rate the proportion of answering 'low' for the highest  
196 pitches, that is they reflect the errors made by the listener at different frequencies.

197 *Psignifit* uses default priors for the threshold, slope, guess, and lapse-rates, based on the given  
198 stimulus range (Schütt et al., 2016, p.109). *Psignifit*'s version 4 fits a beta-binomial model (instead  
199 of a binomial model), which assumes that the probability for a given proportion of answers is itself  
200 a random variable, drawn from a beta distribution. This has been shown to provide better fits for



201 overdispersed data, that is data in which answer probabilities over blocks and trials are not indepen-  
202 dent as assumed by the conventional model.

203 We fitted psychometric functions to each individual's data separately per condition and com-  
204 pared the resulting parameters between conditions (threshold, slope, guess- and lapse rates) using  
205 two-sided t-tests. Additionally, we calculated Bayes Factors for all statistical tests, using the *Bayes*  
206 *Factors* package for Matlab (Rouder et al., 2009).

207 We computed a logistic regression on the single-trial responses of the pitch-discrimination  
208 task, to parallel the analysis of delta phase angles performed for the EEG (see below). Pitch difference  
209 and condition were used as interacting fixed effects (with random intercepts and random slopes for  
210 both predictors and their interaction), using the lme4 package in R (function *glmer*, Bates et al., 2015)  
211 with a binomial link function.

## 212 **Event related potentials**

213 We examined the time-domain data with respect to responses evoked by standard and target tones,  
214 contrasting the predictive and non-predictive condition. For the standard-evoked response, we  
215 detrended the data based on the whole epoch and applied baseline correction from  $-0.1-0$  s pre-  
216 standard. We only examined the time-window between standard onset and 0.5 s after, because this  
217 was the maximal interval in which no target events occurred (earliest target onset was 0.5 s in the  
218 non-predictive condition). For the target-evoked response, we first applied detrending and the same  
219 pre-standard baseline as described above, and then re-epoched to the target event. We examined  
220 the time interval from  $-0.5-0.5$  s around the target event. We averaged over trials within partici-  
221 pants and condition, and then over participants, to obtain the average event related potential (ERP,  
222 depicted in Figure 2).

223 To test for statistically significant differences in the time-domain data, we applied cluster  
224 permutation tests on two levels. First, we contrasted trials from the non-predictive and predictive  
225 condition within each participant using independent samples regression coefficient t-tests imple-  
226 mented in FieldTrip (*ft\_timelockstatistics*). This resulted in t-values for each time-electrode data  
227 point for the ERPs. Next, the group-level analysis was performed with a dependent samples t-test to  
228 contrast the statistics from the subject-level analysis against zero. A permutation test (5000 Monte  
229 Carlo random iterations) was performed with cluster-based control of type I error at a level of  $\alpha=0.05$   
230 as implemented in FieldTrip. The condition assignment (i.e. whether the predictive condition was  
231 presented at the low or high pitch tones) was added as a control variable. This analysis resulted in  
232 time-electrode clusters exhibiting significant condition differences in the ERPs.

## 233 **Time-frequency representations**

234 Time-frequency representations were computed for epochs time-locked to the standard tones, sep-  
235 arately for the predictive and non-predictive condition. We performed this analysis on trials with  
236 foreperiods equal or longer then 1.75 s only to avoid evoked activity from target onsets occurring  
237 early in the non-predictive condition. We matched the smaller number of trials available from the  
238 non-predictive condition, by randomly sampling the same number of trials from the predictive con-

239 dition. To obtain stable results, we repeated the random sampling 50 times and averaged over the  
240 resulting time-frequency representations. Additionally, we ruled out potential back-smearing of  
241 evoked activity related to target-onset by replacing all data points after 1.75 s by the value at this  
242 time point for the respective trial and channel before performing the time-frequency transformation.

243 Data were transformed to time-frequency representations for frequencies ranging from 0.5  
244 to 34.5 Hz (linear steps, 1 Hz) and time points between  $-0.5$ – $2.5$  s, using convolution with a sin-  
245 gle adaptive Hanning taper with frequency-dependent time windows (increasing linearly from 2  
246 to 4 cycles per frequency). To provide sufficiently long data epochs for the lowest frequencies, we  
247 appended the epochs ( $-3$ – $6$  s, time locked to the standard tone) with their inverted and right-left  
248 flipped version to the left and right before applying the time-frequency transform.

249 Power estimates were extracted as the squared modulus of the complex-valued Fourier spec-  
250 tra and baseline corrected to relative change (first subtracting, then dividing by the trial-average  
251 baseline value per frequency) using the condition average in the interval from  $-0.5$  s to standard on-  
252 set. Inter-trial phase coherence (ITC) was extracted as the magnitude of the amplitude-normalized  
253 complex values, averaged across trials for each time-frequency bin and channel. Statistics were per-  
254 formed in the time-window between  $0$ – $1.7$  s post standard onset and for all frequencies jointly. For  
255 power, we used a two-level procedure as described for the ERPs (but using `ft_freqstatistics`, 1000  
256 permutations). For the ITC, we only computed the second-level statistics since it represents a mea-  
257 sure that already combines single trials. An additional, hypotheses-driven cluster test for power and  
258 ITC effects was performed, restricted to the delta band ( $0.5$ – $4$  Hz).

### 259 **Delta phase angle analyses**

260 A timing mechanism that predicts the onset of the target tone would have to start timing at the stan-  
261 dard tone which serves as a temporal cue. Therefore, we examined the data for any signatures of  
262 such a mechanism in the phase of the delta band (see Figure 5B for a schematic depiction). To not  
263 confound target evoked activity with pre-target activity, we used the same version of the data as for  
264 the time-frequency transformations described above, to which no filters had been applied during  
265 preprocessing. To reduce the dimensionality of the data, and to focus our analysis on auditory activ-  
266 ity, we computed a weighted average of single electrodes at each time point. The weights reflected  
267 each participant's N1-peak topography, computed as the average absolute value per channel in the  
268 time interval from  $0.14$ – $0.18$  s following the standard (see topography shown in Figure 5B). We then  
269 multiplied the time-domain data at all latencies and channels with these weights and averaged over  
270 channels, resulting in one virtual channel. Target-onset ERPs were muted (as described above) from  
271 the time point of target onset on each trial ( $1.75$  s in the predictive condition and  $0.5$ – $3$  s in the  
272 non-predictive condition).

273 We then applied a band-pass filter to the data (3rd order Butterworth, two-pass), with cut-  
274 off frequencies of 1 and 3 Hz for the delta band. After filtering, we applied the Hilbert transform  
275 and extracted phase angles as the imaginary value of the complex fourier spectrum averaged over  
276 latencies from  $0.14$ – $0.18$  s, the peak latency of the N1. We chose the peak of the N1 as the window  
277 of interest, the time point at which we measure the first reaction to the standard tone, possibly

278 reflecting a phase reset of ongoing oscillations. Note that we did not choose the later time window in  
279 which the difference in the standard-evoked ERP significantly differed between conditions to avoid  
280 biasing our analysis for a between-condition effect.

281 We subjected the phase angles to a logistic regression to test for an effect of phase angle on the  
282 behavioural response, using the lme4 package in R (function glmer with a binomial link function,  
283 Bates et al., 2015). Per trial, we predicted the participant's response in the pitch discrimination task  
284 (second tone lower or higher) with two numerical predictors, (1) the normalized pitch difference  
285 between standard and target tone ( $\Delta\text{pitch}$  in eq. 1, range  $-1-1$ , a.u.), and (2) the standard-evoked  
286 phase angle extracted as described above ( $\varphi$ ), plus their interaction.

287 The predictors of the logistic regression can be interpreted following the logic of the psycho-  
288 metric function (DeCarlo, 1998), which models a behavioural measure (on the ordinate) based on  
289 variations of a stimulus feature (on the abscissa), and is described by two main parameters: thresh-  
290 old and slope. A threshold effect, that is a horizontal shift of the psychometric function, would be  
291 reflected by a main effect of the predictor  $\varphi$ . A slope effect, that is a shift in the steepness of the  
292 psychometric function, would be reflected by an interaction between the predictors  $\Delta\text{pitch}$  and  $\varphi$ .  
293 Here, we were particularly interested in a slope effect, that is an interaction between the predictors  
294 pitch and phase angle. Due to computational constraints, we only specified a random intercept, but  
295 no random slopes for the predictors.

296 To account for the circularity of the phase angles, we followed an approach previously de-  
297 scribed by Wyart et al. (2012; see also Cravo et al. 2013, Barne et al. 2017) of using the sine and  
298 cosine of the phase angles jointly as linear predictors in a regression. For both, the  $\sin(\varphi)$  and  $\cos(\varphi)$ ,  
299 we specified an interaction with  $\Delta\text{pitch}$ :

$$y = \beta_0 + \beta_1 \cdot (\Delta\text{pitch} \cdot \sin(\varphi)) + \beta_2 \cdot (\Delta\text{pitch} \cdot \cos(\varphi)) \quad (1)$$

300 Then, we recombined the regression weights obtained for the interactions of  $\sin(\varphi)$  and  $\cos(\varphi)$   
301 with  $\Delta\text{pitch}$ :

$$\beta_{\text{combined}} = \sqrt{\beta_1^2 + \beta_2^2} \quad (2)$$

302 The resulting  $\beta_{\text{combined}}$  is always positive and can thus not be tested against zero. We computed  
303 a reference distribution of  $\beta_{\text{combined}}$  based on 1000 permutations, by permuting, per participant, the  
304 response values over trials, recomputed the model and retained the  $\beta_{\text{combined}}$ . To assess significance  
305 of the interaction between pitch and phase angle, we assessed 99% one-sided confidence intervals,  
306 and computed p-values from the permutation distribution (following Phipson and Smyth, 2010):

$$p_{\text{perm}} = \frac{N(\beta_{\text{perm}_{\text{combined}}} > \beta_{\text{combined}}) + 1}{N(\text{perm}) + 1} \quad (3)$$

307 We additionally computed the phase analysis on data filtered for the low delta (0.5–2 Hz),  
308 theta (4–7 Hz), alpha (8–12 Hz), and beta (15–30 Hz) frequency bands and tested the resulting  
309  $\beta_{\text{combined}}$  for significance using the permutation approach. P-values were Bonferroni-corrected (ac-

310 counting for five tests with a p-value threshold of 0.05, one for each frequency band), resulting in an  
311 adjusted alpha level of 0.01.

312 To visualize the modulation of pitch discrimination sensitivity over phase angles, we predicted  
313 responses from the logistic regression model (using the R package *emmeans*, Lenth, 2018), for a range  
314 of  $\Delta pitch$ ,  $\sin(\varphi)$ , and  $\cos(\varphi)$  values, and plotted the resulting values for the recombined and binned  
315  $\varphi$  (shown in Figure 5C).

316 Finally, to assess the temporal specificity of the effect in the delta frequency band, we com-  
317 puted the logistic regression for each time point from -0.1 to 2 s and for each of the two conditions  
318 separately. We also computed a permutation distribution over time (using 200 permutations only,  
319 due to the time-consuming procedure).

### 320 **Distinguishing oscillatory from aperiodic activity**

321 To separate oscillatory activity from aperiodic 1/f activity we applied irregular resampling (IRASA;  
322 Wen and Liu, 2016; see also Helfrich et al., 2018; Henry et al., 2016). This technique consists in  
323 downsampling the data at pairwise non-integer values and computing the geometric mean of the  
324 resulting power spectra. The resampling leaves the 1/f activity intact but removes narrow-band  
325 oscillatory activity.

326 We applied IRASA to the trial-wise data time-locked to the standard tone (-3 to 6 s), to the trial-  
327 averaged data per participant (ERP), and to 9 s of simulated data with a brown noise spectrum (see  
328 Figure 4A), as well as to single trial data from a 3 s snippet during the inter-trial interval (see Figure  
329 4B). Power spectral density (PSD) was computed in sliding windows of 3 s in 0.25 s steps, using  
330 fast a Fourier transform tapered with a Hanning window for a frequency range of 0.33 – 25 Hz,  
331 without detrending, and the default resampling parameter (1.1 to 1.9, 0.05 increment). The PSD  
332 was normalized by dividing all values by the maximum value of the respective total PSD (trial data,  
333 ERP, and simulated data).

## 334 **Results**

### 335 **Temporal predictability improves pitch discrimination**

336 On average, participants' responses were correct in 86% percent of trials. Using the full sample of 49  
337 participants, we found that accuracy was significantly higher in the predictive compared to the non-  
338 predictive condition ( $T(48)=3.77$ ,  $p<0.001$ ,  $BF = 89.6$ ); Figure 1B). We found a marginally significant  
339 increase in accuracy at the intermediate foreperiod for the predictive compared to the non-predictive  
340 condition ( $T(48)=1.8$ ,  $p = 0.07$ ,  $BF = 0.93$ ); Figure 1B), suggesting that the performance improvement  
341 occurred not only at unexpectedly early or late foreperiods, but reflects a difference between condi-  
342 tions.

343 We furthermore analysed response times between conditions and over foreperiods. Response  
344 times were faster in the predictive (average 0.85 s), compared to the non-predictive condition (0.92 s),  
345 by about 70 ms ( $T(48)=8.3$ ,  $p < 0.001$ ,  $BF = 1^{10}$ ). As shown in Figure 1B, the difference is mainly

346 driven by slower responses at early foreperiods in the non-predictive condition, but there is still a  
347 significant difference between the response times at the intermediate foreperiod ( $T(48)=2.10$ ,  $p =$   
348  $0.04$ ,  $BF = 1.47$ ).

349 For the psychometric functions (depicted in Figure 1C), we observed a significant increase of  
350 the slope in the predictive compared to the non-predictive condition ( $T(48)=3.85$ ,  $p<0.001$ , Bayes  
351 Factor ( $BF$ )= $114.3$ ); Figure 1D), but no threshold effect ( $T(48)=1.05$ ,  $p = 0.30$ ,  $BF = 0.35$ ); Figure 1E),  
352 nor effects on the guess rate ( $p = 0.48$ ,  $BF = 0.27$ ) or lapse rate ( $p = 0.44$ ,  $BF = 0.28$ ).

353 To test whether the slope effect might be driven by the shorter or longer foreperiods only,  
354 we computed psychometric functions on the trials with intermediate foreperiods (1.25–1.5 s in the  
355 behavioral sample, 1.33 – 2.17 s in the EEG sample). We found a smaller but significant slope effect  
356 between conditions ( $T(48)= 2.73$ ;  $p<0.01$ ;  $BF = 5.46$ ) showing that the slope difference was not solely  
357 driven by the short or long foreperiods.

358 All of the above results held, albeit with smaller effect sizes, when analysing only the par-  
359 ticipants for whom we had recorded EEG: predictability resulted in marginally higher accuracy,  
360 ( $T(25)=1.82$ ,  $p = 0.08$ ,  $BF = 1.07$ ), significantly larger PMF slopes ( $T(25)=2.60$ ,  $p = 0.02$ ,  $BF = 4.04$ ),  
361 and no effects for the threshold, guess, and lapse rate (all  $p > 0.18$ ,  $BF: 0.43, 0.61, 0.29$ ).

362 To parallel the analysis of delta phase angles reported below, we also computed logistic re-  
363 gression on the behavioural data with the predictors pitch difference ( $\Delta$ pitch), condition, and their  
364 interaction (plus random effects for all three), only for the participants from the EEG sample. The  
365 analysis confirms the results described above, namely a significant main effect for  $\Delta$ pitch ( $p<0.001$ ),  
366 no main effect for condition ( $p = 0.9$ ), but an interaction between  $\Delta$ pitch and condition ( $p<0.01$ ),  
367 that is a slope effect (see Figure 5A).

368 Finally, we assessed to what extent the predictability manipulation had been noticed by par-  
369 ticipants. During debriefing, no participant spontaneously reported to have noticed the manipula-  
370 tion of temporal predictability. Four participants from the behavioral and eight participants from  
371 the EEG sample said they had noticed the manipulation *after* the experimenter explained the it. 16  
372 (70%) of the behavioral and 17 (65%) of the EEG participants guessed correctly whether the high  
373 or low tones were temporally predictive in their case. Neither the participants who recognized the  
374 manipulation once it was explained, nor the ones who guessed correctly which tones were tempo-  
375 rally predictive in their case showed a larger behavioral slope difference than the other ones (one-  
376 tailed Wilcoxon signed rank test,  $p = 0.88$ ,  $p = 0.94$ , respectively). This suggests that the fact that  
377 participants were able to recognize the manipulation once it was explained did not reflect active  
378 engagement in timing during the experiment.

## 379 **Temporal predictability affects both, standard- and target-evoked event related** 380 **potentials:**

381 **Standard-evoked activity:** Event related potentials were examined time-locked to the standard-  
382 tone (Figure 2A). Both conditions showed a negative deflection between 0.1–0.2 s after the standard  
383 onset, with a peak at 0.16 s and a fronto-central topography. We refer to this component as the

384 standard-evoked N1. We observed a significant difference between conditions in the time window  
 385 of the late N1/ early P2 component, where amplitude was more negative for standards that were  
 386 temporally predictive of the onset of the target (predictive condition; 0.21–0.26 s,  $p = 0.04$ ). This  
 387 difference is important in that it shows that standard tones were processed differently if they served  
 388 as a temporal cue for the target onset versus did not serve as a temporal cue. The latency and topog-  
 389 raphy of the standard-evoked N1 (not the time-range in which the difference was found which was  
 390 slightly later) was used for the analysis of phase angles described below. When directly comparing  
 391 the ERPs evoked by the 550 versus 950 Hz standards (randomly assigned to the predictive and non-  
 392 predictive condition over participants), there was no statistically significant difference in the early  
 393 time window following the standard tone.

**A ERP (Fz), time-locked to standard tone**

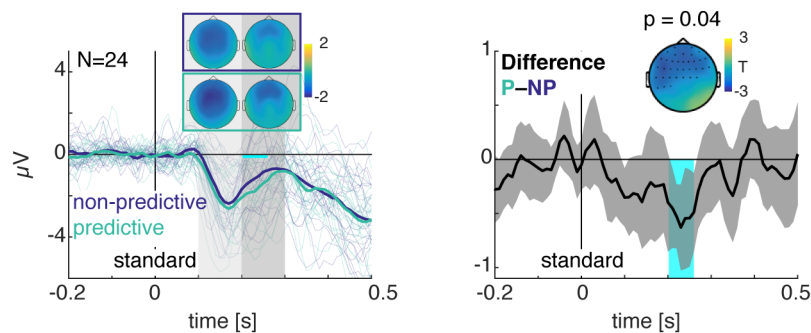

**B ERP (Fz), time-locked to target tone**

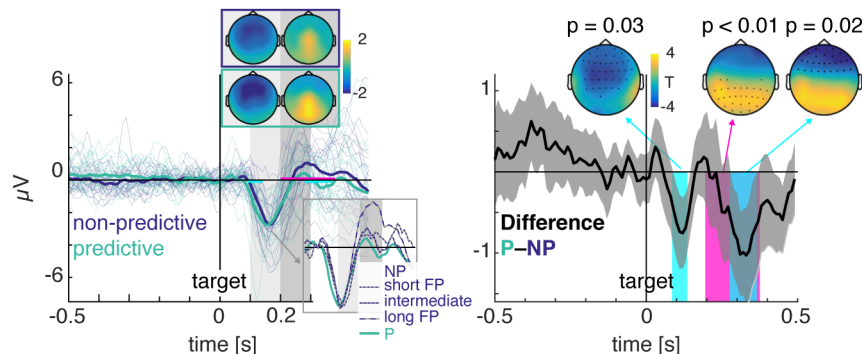

**Figure 2: Event related potentials. A. ERPs time-locked to the standard tone:** Left: The predictive condition (green line) evoked a more negative N1 than the non-predictive condition (blue line). The fine blue and green lines depict single participants' ERPs. The inset shows the topographies in the time windows of 0.1–0.2 s and 0.2–0.3 s for both conditions separately. Right: condition difference. The grey shades indicates the two-sided 95% confidence interval, estimated from the t-distribution. The cyan shade marks the time points at which a significant condition difference occurred, and the topography shows the scalp distribution of the activity during these time windows. Channels at which the difference was significant are marked in black. **B. ERPs time-locked to the target tone:** Left: The predictive condition (green line) evoked an earlier N1 than the non-predictive condition (blue line). The upper inset shows the topographies in the time windows of 0.1–0.2 s and 0.2–0.3 s for both conditions separately. The lower inset exemplarily depicts the target-evoked ERP for the 20% longest, intermediate, and 20% shortest foreperiods. Right: condition difference. The cyan and pink shades mark the time points at which a significant condition difference occurred, and the topographies show the scalp distributions of the activity during these time windows.

394 **Target-evoked activity:** Event related potentials time-locked to the target-tone (Figure 2B) also  
395 showed a negative deflection between 0.1–0.2 s after the target onset, with a fronto-central topogra-  
396 phy. We refer to this component as the target-evoked N1. For targets in the predictive condition, the  
397 N1 was larger (0.09–0.14 s,  $p = 0.03$ ). Importantly, the difference is not solely due to the onset time  
398 of the target (see inset in Figure 3B), which would be reflected by a difference only for long or short  
399 foreperiods in the non-predictive condition.

400 To test for an apparent latency shift in the N1 between the non-predictive and predictive  
401 conditions, we computed the half-area measurement (Luck, 2005), which indexes the time-point at  
402 which half the area of a deflection has been reached. Compared to peak-latencies, this measure  
403 accounts better for asymmetric deflections. We found a significantly earlier N1-latency for the pre-  
404 dictive, compared to the non-predictive condition (Cz, 0.13 s versus 0.15 s;  $T(23)=3.03$ ,  $p < 0.01$ ).  
405 Furthermore, there was an amplitude difference at the later positive prolonged component, which  
406 was positive at posterior and negative at frontal electrodes (0.20–0.38 s,  $p < 0.01$ ; 0.28–0.37 s,  $p =$   
407 0.02). An additional analysis using only the trials with either short or long foreperiods in the non-  
408 predictive condition revealed that the positive difference at posterior channels (cluster marked in  
409 pink in Figure 2B) was driven by the short foreperiod trials, and the negative difference at frontal  
410 channels (cluster marked in light blue in Figure 2B) was driven by the long foreperiod trials.

### 411 **Delta (1–3 Hz) oscillatory changes during predictive foreperiods**

412 We assessed power in a frequency range between 0.5–34.5 Hz for the predictive and non-predictive  
413 conditions (see Figure 3A), time-locked to standard onset. Both conditions showed an increase in  
414 power in the delta-range (1–3 Hz, Figure 3B) after standard onset, and a prolonged increase in the  
415 alpha-range (8–12 Hz) relative to baseline. Subtracting power in the non-predictive from the pre-  
416 dictive condition showed an increase in power for the predictive condition in frequencies ranging  
417 between 0.5–5.5 Hz (0.05–1.7 s,  $p = 0.056$ ), mainly over right temporal and occipital electrodes  
418 (see Figure 3C). Despite testing for effects at all frequencies jointly, we found no other significant  
419 clusters. A hypotheses-driven cluster test restricted to the delta band (0.5–4 Hz) revealed a similar  
420 cluster (0.52–3.52 Hz, 0.3–1.7 s,  $p < 0.01$ ).

421 When comparing inter-trial phase coherence (ITC) for all frequencies between conditions, no  
422 significant differences were observed. However, ITC across the 1–10 Hz range did show the expected  
423 increase following the standard tone, ranging from 1–10 Hz, and a prolonged increase in the delta  
424 band in both conditions (Figure 3C).

### 425 **Standard-evoked delta phase angle predicts pitch discrimination sensitivity**

426 To test whether delta oscillations play a role in temporally predictive processing in this study, we  
427 tested for a relation between delta phase angles evoked by the standard-tone and pitch discrimi-  
428 nation performance using a logistic regression approach (see Figure 5B for a schematic depiction).  
429 A timing mechanism that predicts the onset of the target tone would have to start timing at the  
430 standard tone, which is why we were particularly interested in this time window.

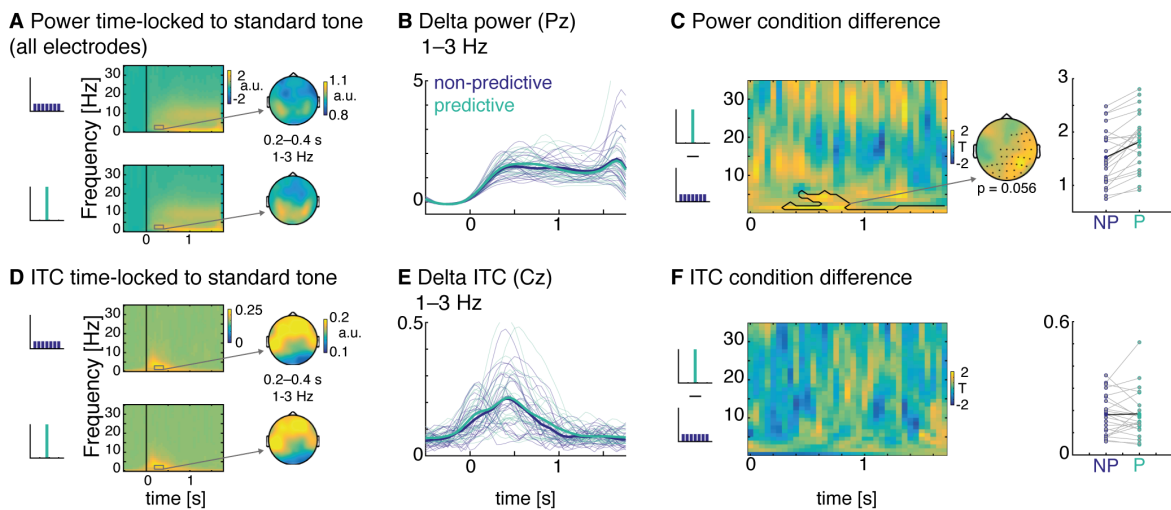

**Figure 3: Time-frequency representations.** **A. Power, time-locked to standard-onset.** Power estimates were baseline-corrected to the pre-standard interval and display relative change. Top panel: non-predictive condition, bottom panel: predictive condition. The topographies show the power scalp distributions in the interval from 0.2–0.4 s for frequencies from 1–3 Hz. **B. Delta power (1–3 Hz) over time** for the non-predictive (blue) and predictive conditions (green). Fine lines depict single participants' power values. **C. Power-difference between conditions (T-values).** The black shape marks the statistically significant cluster, and the topography shows the scalp distribution of the cluster. The scatterplot to the right shows average power values extracted from the cluster peak for each participant. **D. Inter-trial phase coherence (ITC), time-locked to standard-onset.** Top panel: non-predictive condition, bottom panel: predictive condition. The topographies show the ITC scalp distributions in the interval from 0.2–0.4 s for frequencies from 1–3 Hz. **E. Delta ITC (1–3 Hz) over time** for the non-predictive (blue) and predictive conditions (green). Fine lines depict single participants' ITC values. **F. ITC-difference between conditions (T-values).** No significant condition differences were found. The scatterplot to the right shows average ITC values extracted from the peak of the power-difference cluster (above) for each participant.

431 Phase angles in the post-standard time window (0.14–0.18 s) were extracted by applying the  
 432 Hilbert transform to band-pass filtered (1–3 Hz) single trial data with one virtual channel (see Meth-  
 433 ods for details) representing the sum of all channels weighted by the N1-topography. We subjected  
 434 the phase angles (as their sine and cosine) to a logistic regression with two numerical predictors,  
 435 the normalized pitch difference between standard and target tone, and the standard-evoked phase  
 436 angle, plus their interaction. To assess significance of the interaction effect, we used a permutation  
 437 approach. We found a significant interaction between pitch and phase angle, which indicates that  
 438 the slope of the psychometric function varied depending on the delta phase angle evoked by the  
 439 standard tone (Figure 5 C). The interaction effect was significant only for the delta band (1–3 Hz),  
 440 but not for other frequency bands tested (0.5–2 Hz; 4–7 Hz; 8–12 Hz; 15–30 Hz; Figure 5 F). Note  
 441 that this procedure was performed on all trials, without separation into conditions, and thus is gen-  
 442 erally valid, both for trials on which the standard served as a temporal cue and trials for which it did  
 443 not.

444 Next, we tested whether the interaction between delta phase angle and pitch discrimination  
 445 sensitivity was specifically driven by our manipulation of temporal predictability. We examined the  
 446 regression weight for the interaction at different time points over the trial, and independently for  
 447 the predictive and non-predictive conditions. This analysis (Figure 5E) showed that the interaction



448 effect between delta phase angle and the slope of the psychometric function was largest at time  
449 points after the standard tone (0–0.5 s), and that the effect was significant (i.e. exceeded the 99%  
450 confidence interval of the permutation distribution) only for the predictive condition, suggesting  
451 that it was driven by temporal predictability. We therefore conclude that the interaction effect was  
452 mainly driven by the predictive condition.

453 We also assessed the relationship between phase angle (binned into 6 bins for this purpose)  
454 and condition (indexed as -1 for the non-predictive and 1 for the predictive condition; Figure 5 D).  
455 If the trials would be equally distributed over conditions per phase angle bin, this should result in  
456 an average condition of 0 at all phase angles, which was not the case. Instead we found more trials  
457 of the predictive condition to occur at the phase angles at which we had found the higher slopes  
458 (Figure 5 C), which suggests that phase angles varied between the two conditions. As a post-hoc test  
459 for a quadratic effect of phase bin on condition, we computed a generalized linear model predicting  
460 condition from phase bins (coded as 1,0,-1,-1,0,1) and obtained a marginally significant weight for  
461 this contrast ( $p = 0.09$ ), suggesting that there was no significant phase angle difference between  
462 conditions at the population level.

#### 463 Additional analyses

464 To test for the presence of oscillatory activity in the delta band, we subtracted fractal power spectra  
465 (obtained using the irregular resampling method (IRASA; Wen and Liu, 2016) from the total power  
466 spectra. The results (depicted in Figure 4) show that power spectral density (PSD) computed from  
467 single trial data was higher in the 1–3 Hz range compared PSD computed on the ERP and simulated  
468 data, albeit no clear peaks can be found in the delta range (Figure 4A). If anything, the PSD computed  
469 on single trial data has a small peak around 1 Hz, while the PSD of the ERP has two smaller peaks at  
470 3 and 4 Hz. When computing the same analysis on pre-stimulus data (from the ISI, 3 s signals), we  
471 observe residual oscillatory activity in the 1–3 Hz range (Figure 4B). While it is difficult to completely

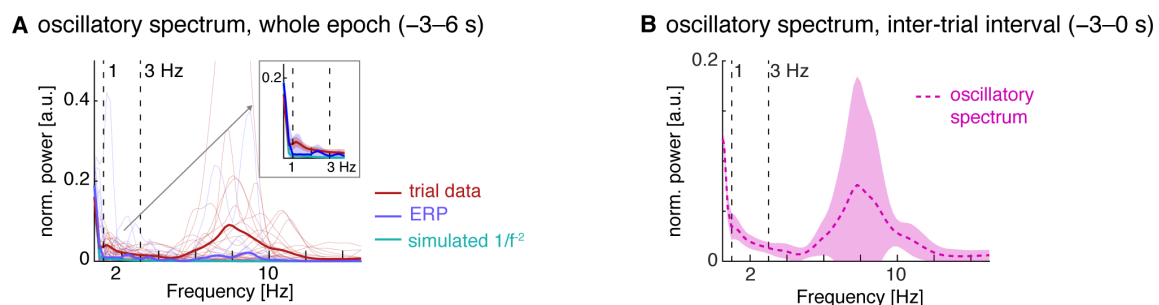

Figure 4: **Testing for oscillatory activity in the 1–3 Hz range using the irregular resampling method.** **A:** from single trial data (red), trial-averaged data (blue) and simulated brown noise (thick lines: average, fine lines: single participants). PSD were normed by dividing all values by the maximum value of the respective total PSD (trial data, ERP, and simulated data). The left panel shows the oscillatory activity, obtained by subtracting the fractal PSD from the total PSD. The inset magnifies the delta frequency range from 1–3 Hz, and the shaded areas show 99% confidence intervals computed from a t-distribution. **B:** Oscillatory spectrum obtained from resampling the pre-stimulus time window (3 s, taken from the ISI). Note the residual oscillatory activity in the 1–3 Hz range.

472 separate oscillatory from 1/f activity at slow frequencies – and to our knowledge, no previous study  
473 showed a clear oscillatory peak in the PSD in the delta range – our analyses suggest some oscillatory  
474 activity in the delta band.

475 **Mediation analysis.** We also considered mathematically the possibility that delta phase angle would  
476 mediate the effect of temporal predictability on pitch discrimination sensitivity, by comparing the  
477 regression weight of the interaction between pitch and temporal predictability estimated from a  
478 model with no other predictors (as depicted in 5A), and from a model that additionally contained  
479 an interaction term for pitch and phase angle (Baron and Kenny, 1986; Muller et al., 2005). The  
480 negligible change in weight between both models (0.307 to 0.304) indicates that there is no evidence  
481 for a mediation effect.

482 **Delta phase versus ERP effect.** To distinguish between the ERP effect (found on the N1) and the  
483 delta phase effect, we tested whether the N1 amplitude could explain the findings. Computing the  
484 same logistic regression model with the N1 amplitude instead of the phase angles as above revealed  
485 no significant interaction effect ( $p = 0.15$ ), i.e. the N1 amplitude does not predict pitch discrimina-  
486 tion performance on single trials and can thus not simply replace the delta phase angle. However, the  
487 N1 amplitude correlated significantly with the standard-evoked phase-angle at all frequency bands,  
488 as assessed by a circular-linear correlation (from the Directional package in R Tsagris et al., 2018);  
489  $R^2$ : 0.5–2Hz: 0.21, 1–3Hz: 0.27, 4–7Hz: 0.06, 8–12Hz: 0.056, 15–30Hz: 0.004 (all p-values <0.001).

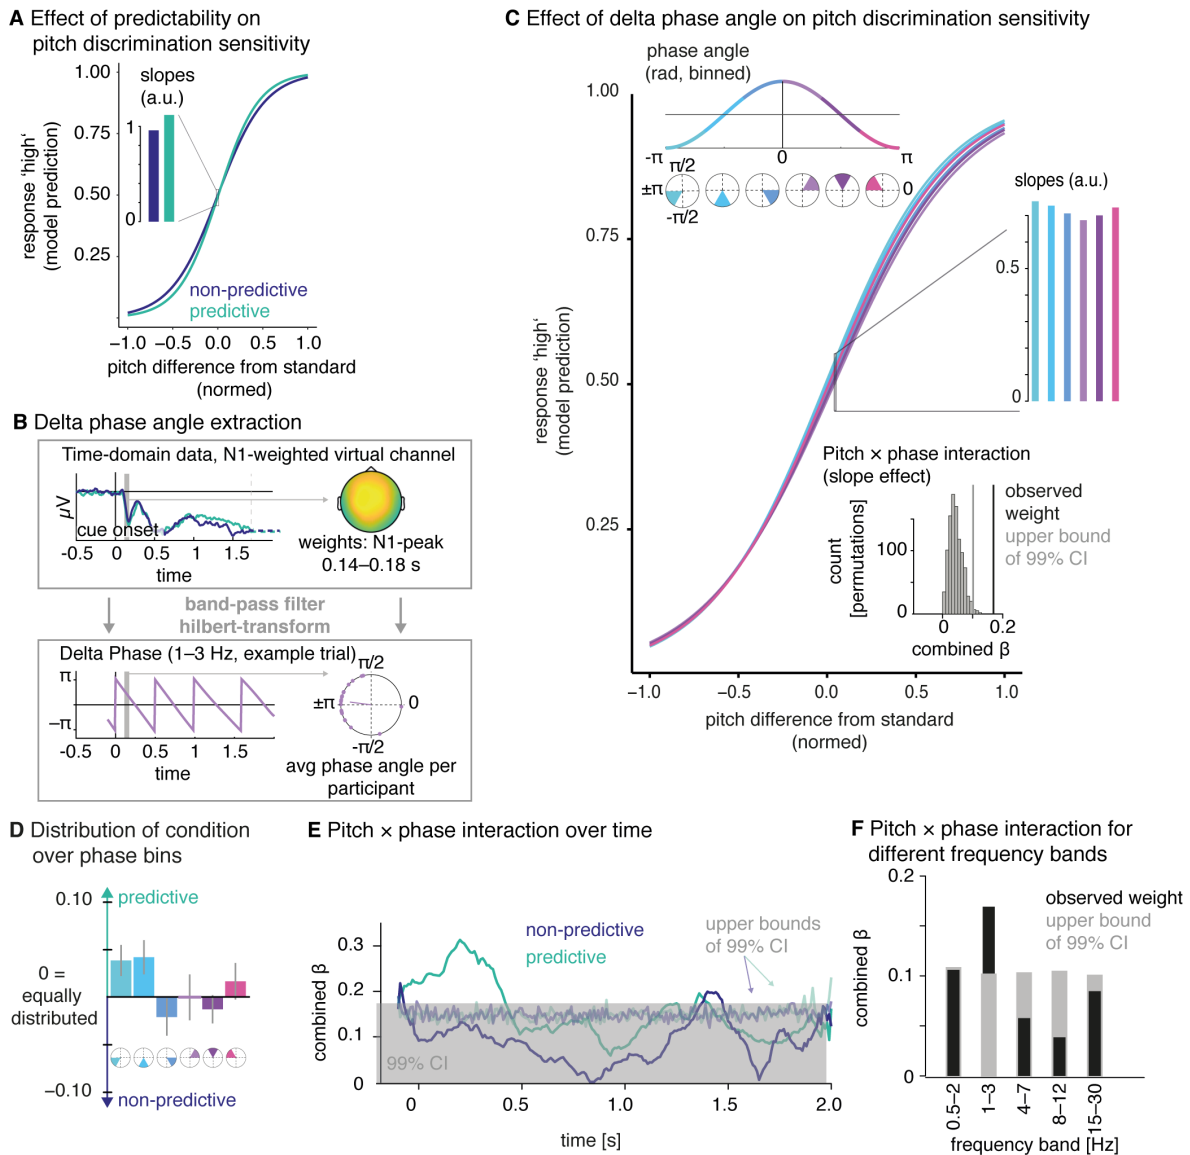

**Figure 5: Delta phase angle predicts pitch discrimination sensitivity.** **A. Replication of the behavioural effect** (s. Figure 1) with a logistic regression approach. Model predictions from the logistic regression with the predictors pitch (abscissa) and condition (colors). As illustrated by the bar-plot, there was a slope difference between conditions (i.e. an interaction between pitch and condition), with steeper slopes for the predictive condition. **B. Schematic depiction of the delta phase angle analysis.** We extracted the time domain data from single trials, from one virtual channel that reflects the weighted sum of the standard-evoked N1 topography (computed in the interval from 0.14–0.18 s), band-pass filtered (1–3 Hz) and applied the Hilbert transform, to extract the instantaneous phase angles in the time-window of 0.14–0.18 s (the N1-peak). **C. Effect of delta phase angle on pitch discrimination sensitivity:** Model predictions from the logistic regression model with the predictors pitch (abscissa) and phase angle (colors, binned only for visual display). There was a significant interaction between pitch and phase, that is the slopes of the psychometric functions differed depending on delta phase angle (depicted in the bar plot). Note that this analysis was performed on all trials, without separation into conditions. The inset on the bottom right side shows the observed interaction weight (in black) compared to a permutation distribution and its 99% confidence interval (in grey). **D. Distribution of conditions over phase angles.** Conditions were coded as  $-1$  for the non-predictive and  $1$  for the predictive condition, therefore an equal distribution of conditions over phase angle bins should result in an average condition (colored bars) of  $0$ , which was not the case. Instead, more trials from the predictive condition occurred at the phase angles that were related to a steeper slope of the psychometric function (panel C).

Figure 5: (Continued from previous page.) **E. Pitch  $\times$  phase interaction over time, separated by condition.** The thick lines indicate the regression weights for the interaction over time for the predictive (green) and non-predictive condition (blue), the thin lines and grey shade indicate the 99% confidence interval computed with the permutation approach. **F. Pitch  $\times$  phase interaction and confidence intervals for different frequency bands.** The grey bar shows the 99% confidence interval, the black bar the observed weight. Only for the delta band (1–3 Hz) the observed weight significantly exceeds the permuted weights.

## Discussion

In this study, we asked whether human listeners use strictly implicit temporal contingencies in auditory input to form temporal predictions. If so, how are these predictions represented endogenously? We implicitly manipulated temporal predictability by varying the foreperiod (i.e., the interval between standard and target tone) in a pitch discrimination task. Unbeknownst to participants, one of two possible pitches used as the standard tone was indicative to one of two foreperiod distributions, respectively: a uniform distribution, under which the onset of the target tone is unpredictable, and a single-valued distribution under which the onset of the target tone is fully predictable. The data show several indices that participants formed temporal predictions: an increase in pitch discrimination sensitivity in the predictive condition, condition differences in the evoked response to standard- and target tones, and increased delta power during the foreperiod in the predictive condition. Furthermore, we show that only the phase of delta oscillations in response to the standard tone, which serves as a temporal cue, is indicative of pitch discrimination performance, suggesting that delta oscillations are instrumental for endogenous temporal predictions.

### Implicit temporal predictability improves pitch discrimination sensitivity

We observed an increase in pitch discrimination sensitivity in the temporally predictive condition, reflected in a steeper slope of the psychometric function (Figure 1). Importantly, participants were not made aware of the predictability manipulation, and no participant was able to correctly describe it during debriefing. About 25% of participants were able to recognize the manipulation after it was described by the experimenter, but these did not show a larger behavioural effect, suggesting they had not actively engaged in timing. While the absolute difference in behavior is not large, likely due to the implicit nature of our task, we observed a robust set of results (49 participants) converging between response times, accuracy and slope effects. These suggests that listeners can implicitly learn to associate interval-based temporal predictions with sensory stimulus features like pitch, underlining the relevance of timing to human cognitive processing.

To our knowledge, this is the first study to show that pitch discrimination sensitivity is improved by implicit but non-rhythmic temporal predictions. In the auditory domain, detection speed and performance are facilitated by rhythmic temporal predictability (Henry et al., 2014; Henry and Obleser, 2012,?; Lawrance et al., 2014; Wright and Fitzgerald, 2004), but the use of detection tasks might underline the timing aspects of the task. One study by Bausenhardt and colleagues (2007)

521 showed that shorter presentation times (difference of about 6 ms) are needed for to achieve cor-  
522 rect pitch discrimination performance, when the target tone occurs with a block of constantly short  
523 foreperiods. Complementing these previous findings, we show that implicit temporal predictability  
524 improves auditory perceptual processing in absence of an embedding rhythm, or any explicit incen-  
525 tive to engage in timing.

## 526 **Temporal predictions affect sensory processing of predictive and predicted tones**

527 **Predictive tones (standards).** An important indicator for the successful extraction of temporal  
528 predictability is the difference in event related potentials evoked by predictive and non-predictive  
529 standard tones (Figure 2A). It suggests that participants learned to associate the pitch of the standard  
530 tone to temporal predictability, and flexibly used the standard as a temporal cue on a trial-by-trial  
531 basis.

532 Few studies have investigated effects of predictability on the early sensory processing of the  
533 cue stimulus itself. In spatial cueing, there is evidence for an effect of predictions on early positive  
534 and negative cue-evoked components (100–200 ms post cue Jongen et al., 2007; Nobre et al., 2000;  
535 Yamaguchi et al., 1994). In the temporal domain, there is, to our knowledge, only one study that  
536 showed an N1-effect directly at the cue (in 8–12 years old children, Mento and Vallesi, 2016). Our  
537 results are in line with this finding and reveal that the standard-evoked N1 in adults is affected even  
538 by implicit temporal predictability.

539 **Predicted tones (targets).** In response to target tones, we found a larger and faster N1 in the pre-  
540 dictive compared to the non-predictive condition, suggesting a facilitation for temporally predicted  
541 targets (Figure 2B). This result corroborates a large base of studies reporting mainly amplitude effects  
542 of temporal predictability in sensory evoked potentials (Correa et al., 2006; Hsu et al., 2014; Hughes  
543 et al., 2013; Kok et al., 2011; Lampar and Lange, 2011; Lange, 2009; Miniussi et al., 1999; Sanders  
544 and Astheimer, 2008; Schwartz et al., 2013). The direction of amplitude effects varies with the  
545 paradigm used (for an extensive discussion see Lange, 2013) – for probabilistic foreperiod variations  
546 as used here, both, reduced (Paris et al., 2016; Sherwell et al., 2017) and enhanced N1 amplitudes  
547 (Griffin et al., 2002) have been reported.

548 The observed latency-shift of the N1 by temporal predictions is in line with one previous study  
549 using a manipulation of foreperiods (Seibold et al., 2011), and one study on rhythmic temporal pre-  
550 dictability (Rimmele et al., 2011). Further evidence comes from experiments reporting a faster N1  
551 for auditory speech and non-speech events combined with visual events (Paris et al., 2017; Stekelen-  
552 burg and Vroomen, 2007; Vroomen and Stekelenburg, 2010; Wassenhove et al., 2005). Note that in  
553 our study, the predictive information conveyed by the cue was purely temporal, since the pitch of the  
554 target tones was unpredictable. Thus, the facilitation of the N1 suggests that temporal predictions  
555 alone can enhance early auditory processing.

## 556 **The role of slow neural oscillations in temporal prediction**

557 A central aim of this study was to assess the role of slow neural oscillations in the endogenous  
558 representation of temporal predictions. Previous studies convincingly established a mechanism of  
559 sensory enhancement via phase alignment of delta oscillations for stimuli that occur during the  
560 preferred phase, i.e. in synchrony with the preceding rhythm (Cravo et al., 2013; Henry et al., 2014;  
561 Kösem et al., 2018; Lakatos et al., 2008; Schroeder and Lakatos, 2009). An open question is, however,  
562 whether the alignment of slow neural oscillations towards predicted stimulus onsets is contingent  
563 on rhythmic entrainment to the exogenous stimulation, or whether slow oscillations also implement  
564 endogenous temporal predictions, for example via single-trial phase-resets.

565 Increased delta power during the foreperiod in the predictive compared to the non-predictive  
566 condition (see Figure 3) suggests a relevance of delta oscillations for temporal predictions. The pre-  
567 dictive and non-predictive conditions were alternated trial-by-trial, indicating that delta power can  
568 be regulated flexibly, possibly reflecting an up-regulation, or large-scale synchronization of delta os-  
569 cillations necessary to represent temporal predictions (Herrmann et al., 2016). This suggests that  
570 a variant of the rhythmic mode of attention, reflected by increased delta power (Schroeder and  
571 Lakatos, 2009) can also apply to interval-based temporal predictions.

572 The absence of condition differences in phase coherence during the foreperiod (Figure 3F)  
573 replicates our previous results (Herbst and Obleser, 2017) and suggests that enhanced phase align-  
574 ment (Breska and Deouell, 2017; Cravo et al., 2011) depends on dedicated or residual periodicity in  
575 the stimulation (Obleser et al., 2017), or overt engagement in timing (Stefanics et al., 2010). As a side  
576 note, it is important to emphasize the methodological challenge of analysing low frequency oscilla-  
577 tions in the pre-target window. The probabilistic manipulation of foreperiods as applied here results  
578 in differential time-locking of target activity between conditions, and our conservative approach of  
579 removing this might have weakened existing pre-target differences. Thus, our findings suggest that  
580 the representation of temporal predictions by enhanced phase coherence – or at least our ability to  
581 measure this in human EEG – is contingent on rhythmic stimulation.

582 Crucially, we found that the absolute phase angle of the delta oscillation in auditory areas  
583 shortly after the temporal cue predicted behavioural sensitivity in response to the later-occurring  
584 target tone (see Figure 5C). The effect was observed for data spatially filtered with a topography  
585 relevant for auditory stimulus processing (from the N1), suggesting auditory cortex as the most  
586 likely generator. Furthermore, the effect was specific for the delta band (1–3 Hz) with the highest  
587 sensitivity occurring at phase angles closest to the trough of the delta oscillation ( $\pm\pi$ ) at the cue and  
588 about 1.7 s post-cue (average period of 0.5 s). Albeit interpreting the absolute phase angle from  
589 EEG data demands caution, this corroborates the idea that the trough of the delta oscillation is a  
590 particularly beneficial state for auditory perception (Henry et al., 2016; Lakatos et al., 2013).

591 While the relationship between delta phase and behavioural sensitivity was true for all trials,  
592 regardless of their experimental condition, follow-up analyses showed that the interaction effect was  
593 stronger in the predictive condition (Figure 5E), and that the phase angle evoked by the standard tone

594 differed marginally between the predictive and non-predictive conditions (Figure 5D), suggesting  
595 that the effect was driven by temporal predictability.

596 An important question is to what respect the observed phase effect reflects truly oscillatory ac-  
597 tivity, rather than a modulation of the evoked response to the standard tone. On theoretical grounds,  
598 we have good reason to assume that auditory processing fluctuates with the phase of delta oscilla-  
599 tions in the absence of evoked activity (Henry et al., 2016; Kayser et al., 2015; Stefanics et al., 2010).  
600 Here, we observe a phase effect that is specific to the frequency range identified by the above-cited  
601 studies, rather than resulting from broad-band activity as one would expect from a purely evoked  
602 effect. Furthermore, spectral analyses suggest some oscillatory activity in the delta band after sub-  
603 tracting the  $1/f$  spectrum, which is not explained by the ERP (see Figure 4). The effect is strongest  
604 in the 1–3 Hz range, and not at the frequencies that would reflect the stimulation (0.57 Hz for the  
605 intermediate foreperiod of 1.75 s), which is in line with a study that showed selective entrainment  
606 at 1.33 Hz despite stimulation at 0.67 Hz (Gomez-Ramirez et al., 2011). We further showed that the  
607 N1 amplitude itself does not show the critical relationship with behavioural sensitivity, although the  
608 two measures correlate, arguing for a more specific role of delta oscillations in temporal prediction.  
609 In fact, the ERP might at least partially result from a reset of ongoing neural dynamics by the onset  
610 of a stimulus (Makeig et al., 2002).

611 Taken together, these findings point towards a dedicated mechanism for temporal prediction involv-  
612 ing delta oscillations. Further research is needed to investigate whether the spontaneously present  
613 low frequency oscillations in the above-cited studies are recruited to implement temporal predic-  
614 tions, for example by comparing the exact frequency bands and neural generators.

615 Clearly, we have not proven a *causal* link of temporal predictability increasing auditory sensi-  
616 tivity *via* an optimized phase angle of delta oscillations. Our analysis failed to establish a mediation  
617 effect. We cannot rule out that the different steps necessary to accommodate the complexity of our  
618 data in the model (dealing with the circular measure of phase angle and assessing an interaction  
619 effect as a measure of behavioural sensitivity), and the small proportion of variance explained by the  
620 experimental manipulation (a common problem in cognitive neuroscience) might have prevented us  
621 from observing a mediation effect (but see Benwell et al., 2017, for a successful example).

622 As an alternative explanation, it is conceivable that the activity we observe reflects the extraction of  
623 temporal predictions from the temporal cue, but that another process is responsible for maintaining  
624 this prediction throughout the foreperiod interval to alert the system when it is time to expect the  
625 target stimulus. For instance, this could be achieved via top-down projections from auditory areas  
626 towards thalamic and thalamostriatal pathways described as crucial for auditory timing (Barczak  
627 et al., 2018; Ponvert and Jaramillo, 2018), converging with an instrumental role of the striatum in  
628 explicit timing (Mello et al., 2015).

629 In sum, our findings underline the relevance and specificity of delta oscillations to the en-  
630 dogenous representation of temporal predictions. The adjustment of phase angles at the cue can be  
631 seen as the initiation of a timing process, which prepares the system to be in a beneficial state at an  
632 anticipated time point.

## 633 **Conclusions**

634 Here we show that human listeners use strictly implicit temporal contingencies to perform a sensory  
635 task for which timing is not an explicit requirement. The neural signatures observed suggest that the  
636 standard tone is used as a temporal cue and provokes an optimized phase reset of delta oscillations  
637 on single trials and an increase in delta power, associated with enhanced behavioural sensitivity in  
638 the predictive condition.



## References

- Arnal, L. H., Doelling, K. B., and Poeppel, D. (2014). Delta–beta coupled oscillations underlie temporal prediction accuracy. *Cerebral Cortex*, 25(9):3077–3085.
- Barczak, A., O’Connell, M. N., McGinnis, T., Ross, D., Mowery, T., Falchier, A., and Lakatos, P. (2018). Top-down, contextual entrainment of neuronal oscillations in the auditory thalamocortical circuit. *Proceedings of the National Academy of Sciences*, 115(32):E7605–E7614.
- Barne, L. C., Claessens, P. M. E., Reyes, M. B., Caetano, M. S., and Cravo, A. M. (2017). Low-frequency cortical oscillations are modulated by temporal prediction and temporal error coding. *NeuroImage*, 146:40–46.
- Baron, R. M. and Kenny, D. A. (1986). The moderator–mediator variable distinction in social psychological research: Conceptual, strategic, and statistical considerations. *Journal of personality and social psychology*, 51(6):1173.
- Bates, D., Mächler, M., Bolker, B., and Walker, S. (2015). Fitting Linear Mixed-Effects Models Using lme4. *Journal of Statistical Software*, 67(1):1–48.
- Bauer, A.-K. R., Jaeger, M., Thorne, J. D., Bendixen, A., and Debener, S. (2015). The auditory dynamic attending theory revisited: A closer look at the pitch comparison task. *Brain Research*, 1626:198–210.
- Bausenhardt, K. M., Rolke, B., and Ulrich, R. (2007). Knowing when to hear aids what to hear. *The Quarterly Journal of Experimental Psychology*, 60(12):1610–1615.
- Benwell, C. S., Keitel, C., Harvey, M., Gross, J., and Thut, G. (2017). Trial-by-trial co-variation of pre-stimulus eeg alpha power and visuospatial bias reflects a mixture of stochastic and deterministic effects. *European Journal of Neuroscience*.
- Besle, J., Schevon, C. A., Mehta, A. D., Lakatos, P., Goodman, R. R., McKhann, G. M., Emerson, R. G., and Schroeder, C. E. (2011). Tuning of the human neocortex to the temporal dynamics of attended events. *Journal of Neuroscience*, 31(9):3176–3185.
- Brainard, D. H. (1997). The Psychophysics Toolbox. *Spatial Vision*, 10(4):433–436.
- Breska, A. and Deouell, L. Y. (2017). Neural mechanisms of rhythm-based temporal prediction: Delta phase-locking reflects temporal predictability but not rhythmic entrainment. *PLoS biology*, 15(2):e2001665.
- Chaumon, M., Bishop, D. V., and Busch, N. A. (2015). A practical guide to the selection of independent components of the electroencephalogram for artifact correction. *Journal of neuroscience methods*, 250:47–63.
- Correa, Á., Lupiáñez, J., Madrid, E., and Tudela, P. (2006). Temporal attention enhances early visual processing: A review and new evidence from event-related potentials. *Brain research*, 1076(1):116–128.
- Correa, Á., Lupiáñez, J., Milliken, B., and Tudela, P. (2004). Endogenous temporal orienting of attention in detection and discrimination tasks. *Perception & Psychophysics*, 66(2):264–278.
- Correa, Á., Lupiáñez, J., and Tudela, P. (2005). Attentional preparation based on temporal expectancy modulates processing at the perceptual level. *Psychonomic bulletin & review*, 12(2):328–334.
- Coull, J. T. and Nobre, A. C. (1998). Where and when to pay attention: the neural systems for directing attention to spatial locations and to time intervals as revealed by both PET and fMRI. *The Journal of Neuroscience: The Official Journal of the Society for Neuroscience*, 18(18):7426–7435.
- Cravo, A. M., Rohenkohl, G., Wyart, V., and Nobre, A. C. (2011). Endogenous modulation of low frequency oscillations by temporal expectations. *Journal of Neurophysiology*, 106(6):2964–2972.
- Cravo, A. M., Rohenkohl, G., Wyart, V., and Nobre, A. C. (2013). Temporal Expectation Enhances Contrast Sensitivity by Phase Entrainment of Low-Frequency Oscillations in Visual Cortex. *The Journal of Neuroscience*, 33(9):4002–4010.

- DeCarlo, L. T. (1998). Signal detection theory and generalized linear models. *Psychological methods*, 3(2):186.
- Gomez-Ramirez, M., Kelly, S. P., Molholm, S., Sehatpour, P., Schwartz, T. H., and Foxe, J. J. (2011). Oscillatory sensory selection mechanisms during intersensory attention to rhythmic auditory and visual inputs: a human electrocorticographic investigation. *Journal of Neuroscience*, 31(50):18556–18567.
- Griffin, I. C., Miniussi, C., and Nobre, A. C. (2002). Multiple mechanisms of selective attention: differential modulation of stimulus processing by attention to space or time. *Neuropsychologia*, 40(13):2325–2340.
- Haegens, S. and Golumbic, E. Z. (2017). Rhythmic facilitation of sensory processing: a critical review. *Neuroscience & Biobehavioral Reviews*.
- Helfrich, R. F., Fiebelkorn, I. C., Szczepanski, S. M., Lin, J. J., Parvizi, J., Knight, R. T., and Kastner, S. (2018). Neural mechanisms of sustained attention are rhythmic. *Neuron*, 99(4):854–865.
- Henry, M. J., Herrmann, B., and Obleser, J. (2014). Entrained neural oscillations in multiple frequency bands comodulate behavior. *Proceedings of the National Academy of Sciences*, 111(41):14935–14940.
- Henry, M. J., Herrmann, B., and Obleser, J. (2016). Neural Microstates Govern Perception of Auditory Input without Rhythmic Structure. *Journal of Neuroscience*, 36(3):860–871.
- Henry, M. J. and Obleser, J. (2012). Frequency modulation entrains slow neural oscillations and optimizes human listening behavior. *Proceedings of the National Academy of Sciences*, 109(49):20095–20100.
- Herbst, S. K. and Obleser, J. (2017). Implicit variations of temporal predictability: Shaping the neural oscillatory and behavioural response. *Neuropsychologia*, 101:141–152.
- Herrmann, B., Henry, M. J., Haegens, S., and Obleser, J. (2016). Temporal expectations and neural amplitude fluctuations in auditory cortex interactively influence perception. *NeuroImage*, 124, Part A:487–497.
- Hsu, Y.-F., Hamalainen, J., and Waszak, F. (2014). Both attention and prediction are necessary for adaptive neuronal tuning in sensory processing. *Frontiers in human neuroscience*, 8:152.
- Hughes, G., Desantis, A., and Waszak, F. (2013). Mechanisms of intentional binding and sensory attenuation: The role of temporal prediction, temporal control, identity prediction, and motor prediction. *Psychological bulletin*, 139(1):133.
- Jones, M. R. (1976). Time, our lost dimension: toward a new theory of perception, attention, and memory. *Psychological review*, 83(5):323.
- Jones, M. R., Moynihan, H., MacKenzie, N., and Puente, J. (2002). Temporal aspects of stimulus-driven attending in dynamic arrays. *Psychological science*, 13(4):313–319.
- Jongen, E. M., Smulders, F. T., and Van der Heiden, J. S. (2007). Lateralized erp components related to spatial orienting: Discriminating the direction of attention from processing sensory aspects of the cue. *Psychophysiology*, 44(6):968–986.
- Kayser, C., Wilson, C., Safaai, H., Sakata, S., and Panzeri, S. (2015). Rhythmic auditory cortex activity at multiple timescales shapes stimulus–response gain and background firing. *Journal of Neuroscience*, 35(20):7750–7762.
- Kok, P., Rahnev, D., Jehee, J. F., Lau, H. C., and De Lange, F. P. (2011). Attention reverses the effect of prediction in silencing sensory signals. *Cerebral cortex*, 22(9):2197–2206.
- Kösem, A., Bosker, H. R., Takashima, A., Meyer, A., Jensen, O., and Hagoort, P. (2018). Neural entrainment determines the words we hear. *Current Biology*, 28(18):2867–2875.
- Lakatos, P., Karmos, G., Mehta, A. D., Ulbert, I., and Schroeder, C. E. (2008). Entrainment of Neuronal Oscillations as a Mechanism of Attentional Selection. *Science*, 320(5872):110–113.

- Lakatos, P., Schroeder, C. E., Leitman, D. I., and Javitt, D. C. (2013). Predictive suppression of cortical excitability and its deficit in schizophrenia. *Journal of Neuroscience*, 33(28):11692–11702.
- Lampar, A. and Lange, K. (2011). Effects of temporal trial-by-trial cuing on early and late stages of auditory processing: evidence from event-related potentials. *Attention, Perception, & Psychophysics*, 73(6):1916–1933.
- Lange, K. (2009). Brain correlates of early auditory processing are attenuated by expectations for time and pitch. *Brain and cognition*, 69(1):127–137.
- Lange, K. (2013). The ups and downs of temporal orienting: a review of auditory temporal orienting studies and a model associating the heterogeneous findings on the auditory N1 with opposite effects of attention and prediction. *Frontiers in Human Neuroscience*, 7.
- Large, E. W. and Jones, M. R. (1999). The dynamics of attending: How people track time-varying events. *Psychological Review*, 106(1):119–159.
- Lawrance, E. L. A., Harper, N. S., Cooke, J. E., and Schnupp, J. W. H. (2014). Temporal predictability enhances auditory detection. *The Journal of the Acoustical Society of America*, 135(6):EL357–EL363.
- Lenth, R. (2018). *emmeans: Estimated Marginal Means, aka Least-Squares Means*. R package version 1.1.
- Luck, S. J. (2005). An introduction to the event-related potential technique mit press. *Cambridge, Ma*, pages 45–64.
- Makeig, S., Westerfield, M., Jung, T.-P., Enghoff, S., Townsend, J., Courchesne, E., and Sejnowski, T. J. (2002). Dynamic brain sources of visual evoked responses. *Science*, 295(5555):690–694.
- Mello, G. B., Soares, S., and Paton, J. J. (2015). A scalable population code for time in the striatum. *Current Biology*, 25(9):1113–1122.
- Mento, G. and Vallesi, A. (2016). Spatiotemporally dissociable neural signatures for generating and updating expectation over time in children: A high density-erp study. *Developmental cognitive neuroscience*, 19:98–106.
- Miniussi, C., Wilding, E. L., Coull, J. T., and Nobre, A. C. (1999). Orienting attention in time. Modulation of brain potentials. *Brain: A Journal of Neurology*, 122 ( Pt 8):1507–1518.
- Morillon, B., Schroeder, C. E., Wyart, V., and Arnal, L. H. (2016). Temporal prediction in lieu of periodic stimulation. *Journal of Neuroscience*, 36(8):2342–2347.
- Muller, D., Judd, C. M., and Yzerbyt, V. Y. (2005). When moderation is mediated and mediation is moderated. *Journal of personality and social psychology*, 89(6):852.
- Niemi, P. and Näätänen, R. (1981). Foreperiod and simple reaction time. *Psychological Bulletin*, 89(1):133–162.
- Nobre, A. C., Correa, A., and Coull, J. T. (2007). The hazards of time. *Current Opinion in Neurobiology*, 17(4):465–470.
- Nobre, A. C., Sebestyen, G. N., and Miniussi, C. (2000). The dynamics of shifting visuospatial attention revealed by event-related potentials. *Neuropsychologia*, 38(7):964–974.
- Nobre, A. C. and van Ede, F. (2018). Anticipated moments: temporal structure in attention. *Nature Reviews Neuroscience*, 19(1):34.
- Obleser, J., Henry, M. J., and Lakatos, P. (2017). What do we talk about when we talk about rhythm? *PLoS biology*, 15(9):e2002794.
- Paris, T., Kim, J., and Davis, C. (2016). The processing of attended and predicted sounds in time. *Journal of cognitive neuroscience*, 28(1):158–165.
- Paris, T., Kim, J., and Davis, C. (2017). Visual form predictions facilitate auditory processing at the n1. *Neuroscience*, 343:157–164.
- Pelli, D. G. (1997). The VideoToolbox software for visual psychophysics: transforming numbers into movies. *Spatial Vision*, 10(4):437–442.

- Phipson, B. and Smyth, G. K. (2010). Permutation p-values should never be zero: calculating exact p-values when permutations are randomly drawn. *Statistical applications in genetics and molecular biology*, 9(1).
- Ponvert, N. D. and Jaramillo, S. (2018). Auditory thalamostriatal and corticostriatal pathways convey complementary information about sound features. *Journal of Neuroscience*, pages 1188–18.
- R Core Team (2016). R: A language and environment for statistical computing. R Foundation for Statistical Computing, Vienna, Austria. URL <https://www.R-project.org/>.
- Rimmele, J., Jolsvai, H., and Sussman, E. (2011). Auditory target detection is affected by implicit temporal and spatial expectations. *Journal of cognitive neuroscience*, 23(5):1136–1147.
- Rimmele, J. M., Morillon, B., Poeppel, D., and Arnal, L. H. (2018). Proactive sensing of periodic and aperiodic auditory patterns. *Trends in cognitive sciences*, 22(10):870–882.
- Rohenkohl, G., Cravo, A. M., Wyart, V., and Nobre, A. C. (2012). Temporal expectation improves the quality of sensory information. *The Journal of neuroscience*, 32(24):8424–8428.
- Rolke, B. and Hofmann, P. (2007). Temporal uncertainty degrades perceptual processing. *Psychonomic Bulletin & Review*, 14(3):522–526.
- Rouder, J. N., Speckman, P. L., Sun, D., Morey, R. D., and Iverson, G. (2009). Bayesian t tests for accepting and rejecting the null hypothesis. *Psychonomic Bulletin & Review*, 16(2):225–237.
- Rousselet, G. A. (2012). Does filtering preclude us from studying erp time-courses? *Frontiers in psychology*, 3:131.
- Sanders, L. D. and Astheimer, L. B. (2008). Temporally selective attention modulates early perceptual processing: Event-related potential evidence. *Perception & psychophysics*, 70(4):732–742.
- Schaal, N. K., Bauer, A.-K. R., and Müllensiefen, D. (2014). Der gold-msi: replikation und validierung eines fragebogeninstrumentes zur messung musikalischer erfahrung anhand einer deutschen stichprobe. *Musicae Scientiae*, 18(4):423–447.
- Schmidt-Kassow, M., Schubotz, R. I., and Kotz, S. A. (2009). Attention and entrainment: P3b varies as a function of temporal predictability. *Neuroreport*, 20(1):31–36.
- Schroeder, C. E. and Lakatos, P. (2009). Low-frequency neuronal oscillations as instruments of sensory selection. *Trends in Neurosciences*, 32(1):9–18.
- Schütt, H. H., Harmeling, S., Macke, J. H., and Wichmann, F. A. (2016). Painfree and accurate Bayesian estimation of psychometric functions for (potentially) overdispersed data. *Vision Research*, 122:105–123.
- Schwartz, M., Farrugia, N., and Kotz, S. A. (2013). Dissociation of formal and temporal predictability in early auditory evoked potentials. *Neuropsychologia*, 51(2):320–325.
- Seibold, V. C., Fiedler, A., and Rolke, B. (2011). Temporal attention shortens perceptual latency: A temporal prior entry effect. *Psychophysiology*, 48(5):708–717.
- Sherwell, C., Garrido, M. I., and Cunningham, R. (2017). Timing in predictive coding: The roles of task relevance and global probability. *Journal of cognitive neuroscience*, 29(5):780–792.
- Stefanics, G., Hangya, B., Hernádi, I., Winkler, I., Lakatos, P., and Ulbert, I. (2010). Phase entrainment of human delta oscillations can mediate the effects of expectation on reaction speed. *The Journal of neuroscience*, 30(41):13578–13585.
- Stekelenburg, J. J. and Vroomen, J. (2007). Neural Correlates of Multisensory Integration of Ecologically Valid Audiovisual Events. *Journal of Cognitive Neuroscience*, 19(12):1964–1973.
- Tsagris, M., Athineou, G., Sajib, A., Amson, E., and Waldstein, M. J. (2018). *Directional: Directional Statistics*. R package version 3.3.
- van Wassenhove, V. (2016). Temporal cognition and neural oscillations. *Current Opinion in Behavioral Sciences*, 8:124–130.

- Vroomen, J. and Stekelenburg, J. J. (2010). Visual anticipatory information modulates multisensory interactions of artificial audiovisual stimuli. *Journal of Cognitive Neuroscience*, 22(7):1583–1596.
- Wassenhove, V. v., Grant, K. W., and Poeppel, D. (2005). Visual speech speeds up the neural processing of auditory speech. *Proceedings of the National Academy of Sciences of the United States of America*, 102(4):1181–1186.
- Wen, H. and Liu, Z. (2016). Separating fractal and oscillatory components in the power spectrum of neurophysiological signal. *Brain topography*, 29(1):13–26.
- Wichmann, F. A. and Hill, N. J. (2001). The psychometric function: II. Bootstrap-based confidence intervals and sampling. *Attention, Perception, & Psychophysics*, 63(8):1314–1329.
- Widmann, A., Schröger, E., and Maess, B. (2015). Digital filter design for electrophysiological data—a practical approach. *Journal of neuroscience methods*, 250:34–46.
- Wilsch, A., Henry, M. J., Herrmann, B., Herrmann, C. S., and Obleser, J. (2018). Temporal expectation modulates the cortical dynamics of short-term memory. *Journal of Neuroscience*, pages 2928–17.
- Wilsch, A., Henry, M. J., Herrmann, B., Maess, B., and Obleser, J. (2014). Alpha oscillatory dynamics index temporal expectation benefits in working memory. *Cerebral Cortex*, 25(7):1938–1946.
- Wilsch, A., Henry, M. J., Herrmann, B., Maess, B., and Obleser, J. (2015). Slow-delta phase concentration marks improved temporal expectations based on the passage of time. *Psychophysiology*, 52(7):910–918.
- Woodrow, H. (1914). The measurement of attention. *The Psychological Monographs*, 17(5):i.
- Wright, B. A. and Fitzgerald, M. B. (2004). The time course of attention in a simple auditory detection task. *Perception & Psychophysics*, 66(3):508–516.
- Wyart, V., de Gardelle, V., Scholl, J., and Summerfield, C. (2012). Rhythmic fluctuations in evidence accumulation during decision making in the human brain. *Neuron*, 76(4):847–858.
- Yamaguchi, S., Tsuchiya, H., and Kobayashi, S. (1994). Electroencephalographic activity associated with shifts of visuospatial attention. *Brain*, 117(3):553–562.
- Zoefel, B. and Heil, P. (2013). Detection of near-threshold sounds is independent of eeg phase in common frequency bands. *Frontiers in psychology*, 4:262.
